# Supplementary material
Source: PubMed Central journal article supplement (PMC2797174)

Supplemental Table 1. Primer and probe sequences used for qPCR.

| Gene          | Sense                                   | Antisense                                 | Probe                                               | Accession number |
|---------------|-----------------------------------------|-------------------------------------------|-----------------------------------------------------|------------------|
| <i>Aox</i>    | GCC ACG GAA<br>CTC ATC TTC GA           | CCA GGC CAC<br>CAC TTA ATG GA             | CCA CTG CCA<br>CAT ATG ACC<br>CCA AGA CCC           | NM_015729        |
| <i>Elovl5</i> | TGG CTG TTC TTC<br>CAG ATT GGA          | CCC TTT CTT GTT<br>GTA AGT CTG<br>AAT GTA | CAT GAT TTC CCT<br>GAT TGC TCT CTT<br>CAC AAA C     | NM_134255.2      |
| <i>Elovl6</i> | ACA CGT AGC<br>GAC TCC GAA<br>GAT       | AGC GCA GAA<br>AAC AGG AAA<br>GAC T       | TTT CCT GCA TCC<br>ATT GGA TGG CTT<br>C             | NM_130450.2      |
| <i>Fads1</i>  | CCT TCG CGG<br>ACA TTG TTT ACT<br>C     | TAT GGA GGT<br>CTG CTG CTG CTA<br>T       | CTC TGG TTG GAC<br>GCT TAC CTT CAC<br>CA            | NM_013402.3      |
| <i>Fads2</i>  | CCC TGA TCG<br>ACA TTG TGA GTT<br>C     | GAC GGC AGC<br>TTC ATT TAT GGA            | CCA GCC ACA<br>GCT CCC CAG<br>ACT TCT               | NM_019699.1      |
| <i>Fgf-21</i> | CCG CAG TCC<br>AGA AAG TCT CC           | TGA CAC CCA<br>GGA TTT GAA<br>TGA C       | CCT GGC TTC<br>AAG GCT TTG<br>AGC TCC A             | NM_020013.4      |
| <i>G6pdh</i>  | GCA ACA GAT<br>ACA AGA ATG<br>TGA AGC T | AGG CTT CCC<br>TGA GTT CAT CAC<br>T       | CCT ATG AAC<br>GCC TCA TCC TGG<br>ATG TCT T         | NM_008062        |
| <i>Gyk</i>    | GGG TTG GTG<br>TGT GGA GTC TTG          | GAT TTC GCT TTC<br>TTC AGC ATT GA         | ACC GCT CCA TTG<br>TGA CAG CTG<br>ACA               | NM_008194.3      |
| <i>Lcad</i>   | TAC GGC ACA<br>AAA GAA CAG<br>ATC G     | CAG GCT CTG<br>TCA TGG CTA<br>TGG         | CAC TTG CCC GCC<br>GTC ATC TGG                      | NM_007381        |
| <i>Me1</i>    | AGG CAG CGT<br>CTT CCA AAT ATG          | TCG ATA CTT GTT<br>CAG GAG ACG AA         | TGG CAA AAT<br>CTT CAA ACT<br>GAA TAA GGC<br>AAT TC | NM_008615.1      |
| <i>6Pdgh</i>  | GGA CAT CCG<br>TAA GGC CCT<br>CTA T     | ATT GAG GGT<br>CCA GCC AAA<br>CTC         | CTT TAT GCT GCT<br>CAG ACA GGC<br>AGC CAC           | NM_025801        |
| <i>Taldo1</i> | CAG AAG TTG<br>ATG CAA GGC<br>TTT C     | CCA GCT TCT TTG<br>TAA AGC TCG A          | CTC GGG CCA<br>CCA TGG CAT CC                       | NM_011528        |
| <i>Tkt</i>    | GCA TCC TGT CCC<br>GAA ACA AG           | CAA TAG ACT<br>CGG TAG CTG<br>GCT TT      | CCC TGG CCC<br>AGG GAG CCA GT                       | NM_009388        |

*Aox*, acyl-CoA oxidase; *Elovl*, fatty acid elongase; *Fads*, fatty acid desaturase; *Fgf-21*, fibroblast growth factor 21; *G6pdh*, glucose-6-phosphate dehydrogenase; *Gyk*, glycerol kinase; *Lcad*, long-chain acyl-CoA dehydrogenase; *Me*, malic enzyme; *Pdgh*, 6-phosphogluconate dehydrogenase; *Taldo*, transaldolase; *Tkt*, transketolase.

Supplemental Table 2. Hepatic gene expression levels.

|                                  | <b>Srebp-1c<sup>+/+</sup><br/>control</b> | <b>Srebp-1c<sup>+/+</sup><br/>fenofibrate</b> | <b>Srebp-1c<sup>-/-</sup><br/>control</b> | <b>Srebp-1c<sup>-/-</sup><br/>fenofibrate</b> |
|----------------------------------|-------------------------------------------|-----------------------------------------------|-------------------------------------------|-----------------------------------------------|
| <i>Fatty acid esterification</i> |                                           |                                               |                                           |                                               |
| Dgat1                            | 1.0±0.1                                   | 2.4±0.1*                                      | 1.0±0.0                                   | 1.3±0.1                                       |
| Dgat2                            | 1.0±0.0                                   | 0.8±0.0                                       | 1.0±0.0                                   | 0.6±0.0*                                      |
| Gpat                             | 1.0±0.0                                   | 1.8±0.0*                                      | 1.0±0.0                                   | 1.2±0.1                                       |
| <i>PPP/NADPH synthesis</i>       |                                           |                                               |                                           |                                               |
| G6pdh                            | 1.0±0.1                                   | 2.0±0.5                                       | 1.0±0.2                                   | 0.7±0.1                                       |
| 6Pdgh                            | 1.0±0.1                                   | 3.2±0.2*                                      | 1.0±0.0                                   | 1.5±0.2*                                      |
| Taldo1                           | 1.0±0.1                                   | 1.5±0.1*                                      | 1.0±0.1                                   | 1.1±0.0                                       |
| Me1                              | 1.0±0.1                                   | 6.0±0.4*                                      | 1.0±0.1                                   | 2.8±0.3*                                      |
|                                  | <b>Chrebp<sup>+/+</sup><br/>control</b>   | <b>Chrebp<sup>+/+</sup><br/>fenofibrate</b>   | <b>Chrebp<sup>-/-</sup><br/>control</b>   | <b>Chrebp<sup>-/-</sup><br/>fenofibrate</b>   |
| <i>Fatty acid esterification</i> |                                           |                                               |                                           |                                               |
| Dgat1                            | 1.0±0.1                                   | 2.6±0.3*                                      | 1.0±0.0                                   | 3.0±0.1*                                      |
| Dgat2                            | 1.0±0.1                                   | 0.6±0.1*                                      | 1.0±0.0                                   | 0.8±0.0                                       |
| Gpat                             | 1.0±0.1                                   | 1.3±0.1                                       | 1.0±0.0                                   | 2.0±0.1*                                      |
| <i>PPP/NADPH synthesis</i>       |                                           |                                               |                                           |                                               |
| G6pdh                            | 1.0±0.1                                   | 0.9±0.2                                       | 1.0±0.1                                   | 1.2±0.1                                       |
| 6Pdgh                            | 1.0±0.0                                   | 2.4±0.3*                                      | 1.0±0.1                                   | 3.3±0.3*                                      |
| Taldo1                           | 1.0±0.1                                   | 1.8±0.3*                                      | 1.0±0.1                                   | 1.8±0.3*                                      |
| Me1                              | 1.0±0.1                                   | 4.9±0.4*                                      | 1.0±0.1                                   | 10.8±1.2*                                     |

Expression levels were normalized to 18S expression. Values of untreated mice of each genotype were set to 1. Values are given as means ± SEM for n=4; \*  $p < 0.05$  fenofibrate vs. control (Mann-Whitney U-test). *Dgat*, diacylglycerol acyltransferase; *Gpat*, glycerol-3-phosphate acyltransferase; *G6pdh*, glucose-6-phosphate dehydrogenase; *6Pdgh*, 6-phosphogluconate dehydrogenase; *Taldo*, transaldolase; *Me*, malic enzyme.

*Supplemental Table 3.* Hepatic gene expression levels.

---

|       | <b>Control</b> | <b>Fenofibrate</b> |
|-------|----------------|--------------------|
| Lxra  | 1.0±0.0        | 0.9±0.1            |
| Abca1 | 1.0±0.2        | 1.1±0.1            |
| Abcg5 | 1.0±0.2        | 0.8±0.2            |
| Abcg1 | 1.0±0.2        | 0.9±0.1            |

---

Values are given as means ± SEM for  $n=6$ . *Lxra*, Liver X Receptor  $\alpha$ ; *Abca1/g1/g5*, ATP binding cassette a1/g1/g5.

*Supplemental Table 4.* Blood glucose concentrations and primary isotopic parameters.

|                         | <b>Control</b> | <b>Fenofibrate</b> |
|-------------------------|----------------|--------------------|
| Blood glucose (mM)      | 8.2±0.2        | 8.5±0.6            |
| <i>Isotope dilution</i> |                |                    |
| d(glc)                  | 0.018±0.001    | 0.018±0.002        |
| d(UDPglc)               | 0.196±0.010    | 0.166±0.009*       |
| <i>Isotope exchange</i> |                |                    |
| c(glc)                  | 0.176±0.011    | 0.079±0.005*       |
| c(UDPglc)               | 0.137±0.008    | 0.157±0.008        |
| <i>MIDA analysis</i>    |                |                    |
| f(glc)                  | 0.55±0.02      | 0.59±0.02          |
| f(UDPglc)               | 0.46±0.02      | 0.53±0.01*         |

Values are given as means ± SEM for  $n=5-6$ ; \*  $p<0.05$  fenofibrate vs. control (Mann-Whitney U-test). d(glc), fractional contribution of infused glucose to blood glucose; d(UDPglc), fractional contribution of infused galactose to uridine diphosphate-glucose; c(glc), fractional contribution of blood glucose to UDP-glucose formation; c(UDPglc), fractional contribution of UDPglucose to blood glucose formation; MIDA, mass isotopomer distribution analysis; f(glc), fractional contribution of newly synthesized glucose to blood glucose; f(UDPglc), fractional contribution of newly synthesized glucose to UDPglc pool.

# Supplemental Figure 1

Schematic model of hepatic carbohydrate metabolism. Major metabolic pathways and enzymatic reactions are depicted, sharing glucose-6-phosphate (G6P) as a central metabolite. The pathways included are: (1) Gluconeogenic flux toward G6P, (2) Glycogen phosphorylase flux, (3) Glucose-6-phosphatase flux, (4) Glucokinase flux and (5) Glycogen synthase flux. Mice received an infusion containing [U-<sup>13</sup>C]glucose, [2-<sup>13</sup>C]glycerol, [1-<sup>2</sup>H]galactose and paracetamol for six hours. Mass isotopomer distribution analysis (MIDA) was applied on blood glucose and urinary paracetamol glucuronide samples.

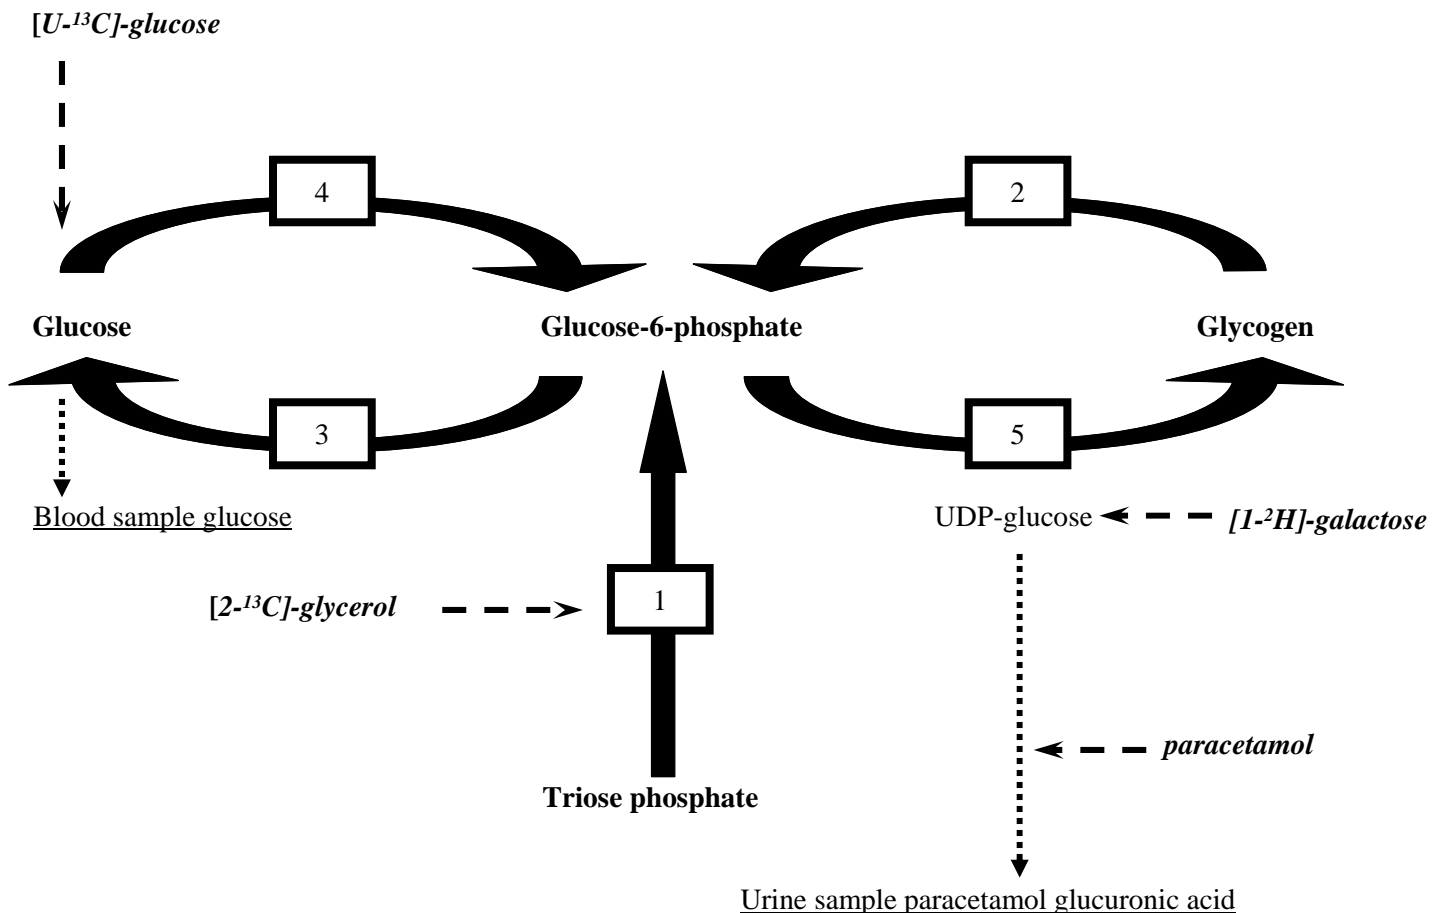

Supplement: supp_M109.051052_jbc.M109.051052-1.pdf [file supp_M109.051052_jbc.M109.051052-1.pdf]
